# Supplementary material
Source: publisher figshare collection journal article supplement (https://karger.figshare.com/ndownloader/files/28904145)
Supplement: Supplementary file 1 [file 28904145]

**Supplementary Figure 2**: 63-year-old woman with surgically proven multilocular cystic renal cell carcinoma, ISUP 1, in right kidney.

A and B, axial unenhanced (A) and contrast-enhanced (B) T1 weighted MRI sequences show a 3 cm cystic mass at lower pole of right kidney with thin enhancing septa (arrow).

C and D, gray-scale (C) and contrast-enhanced (D) sonographies show peripheral thickened enhancing wall combined with thickened enhancing septa (arrow), classified Bosniak III.
